# Supplementary material for: Identification of Proteins Associated with an IFNγ-Responsive Promoter by a Retroviral Expression System for enChIP Using CRISPR
Source: PubMed Central journal article supplement (PMC4106880; doi:10.1371/journal.pone.0103084), 2014-07-22

Figure S1

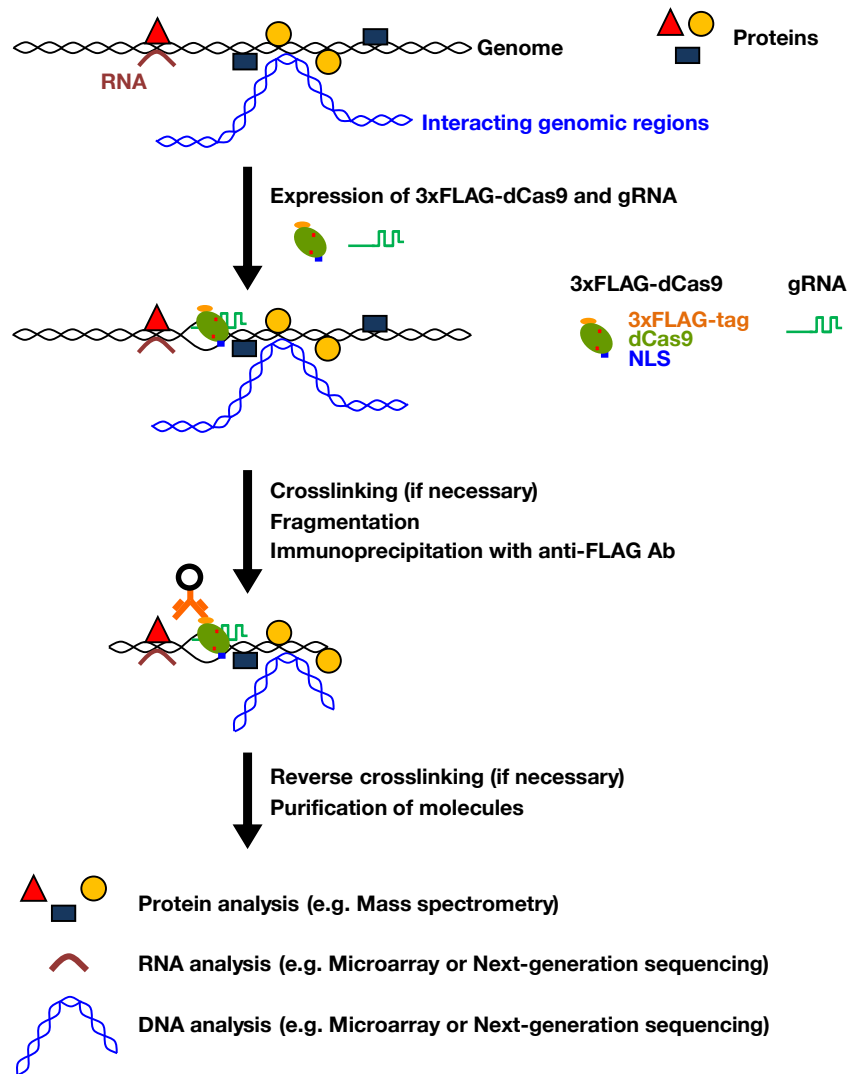

Supplement: pone.0103084.s001.pdf [file pone.0103084.s001.pdf]
