# Supplementary material for: Identification of Proteins Associated with an IFNγ-Responsive Promoter by a Retroviral Expression System for enChIP Using CRISPR
Source: PubMed Central journal article supplement (PMC4106880; doi:10.1371/journal.pone.0103084), 2014-07-22
Supplement: pone.0103084.s008.pdf [file pone.0103084.s008.pdf]

**Table S2. Primers used in this study**

| Number | Name                    | Sequence (5' → 3')       | Experiments                                                              |
|--------|-------------------------|--------------------------|--------------------------------------------------------------------------|
| 27310  | hIRF1-prom-F            | cgctcgttcgggagatatac     | enChIP and ChIP assays in Figs. 1 (IRF-1), 3 (-0.3 kb), and S6 (-0.3 kb) |
| 27312  | hIRF1-prom-R1+2         | ctgtcctcactccgcctgt      | enChIP and ChIP assays in Figs. 1 (IRF-1), 3 (-0.3 kb), and S6 (-0.3 kb) |
| 27222  | hSox2-prom-F            | attgctcctagaaccatttatt   | enChIP and ChIP assays in Figs. 1, 3, and S6 (Sox2)                      |
| 27223  | hSox2-prom-R            | ctgccttgacaactcctgatactt | enChIP and ChIP assays in Figs. 1, 3, and S6 (Sox2)                      |
| 27513  | hIRF1-OffTarget-Chr11-F | agcctcagtttcttctggaca    | enChIP assay in Fig. 1 (Chr11)                                           |
| 27514  | hIRF1-OffTarget-Chr11-R | ccccaagatgacaaaagagcta   | enChIP assay in Fig. 1 (Chr11)                                           |
| 27507  | hIRF1-OffTarget-Chr14-F | cctcccttctgggattatttg    | enChIP assay in Fig. 1 (Chr14)                                           |
| 27508  | hIRF1-OffTarget-Chr14-R | tattggcaggaacactaattgc   | enChIP assay in Fig. 1 (Chr14)                                           |
| 27509  | hIRF1-OffTarget-Chr17-F | agagcaggaatgacacaaagcag  | enChIP assay in Fig. 1 (Chr17)                                           |
| 27510  | hIRF1-OffTarget-Chr17-R | gagactacacggaaccagacac   | enChIP assay in Fig. 1 (Chr17)                                           |
| 27517  | hIRF1-OffTarget-Chr1-F  | aaagccacagcgtcctaattc    | enChIP assay in Fig. 1 (Chr1)                                            |
| 27518  | hIRF1-OffTarget-Chr1-R  | ctccctgaccttggctccatag   | enChIP assay in Fig. 1 (Chr1)                                            |
| 27519  | hIRF1-OffTarget-Chr22-F | cgagggcctagctgtctct      | enChIP assay in Fig. 1 (Chr22)                                           |
| 27520  | hIRF1-OffTarget-Chr22-R | cagctgtctgacccacagt      | enChIP assay in Fig. 1 (Chr22)                                           |
| 27561  | hIRF1-(-1k)-F           | gggactcagagatgacagcaatg  | ChIP assay in Figs. 3 and S6 (-1 kb)                                     |
| 27562  | hIRF1-(-1k)-R           | tctgatecctctagcactcttg   | ChIP assay in Figs. 3 and S6 (-1 kb)                                     |
| 27416  | hIRF1-prom-F5           | gtagcttctgctccttcaact    | ChIP assay in Figs. 3 and S6 (-0.6 kb)                                   |
| 27417  | hIRF1-prom-R5           | atcaagaaggagggttccagtc   | ChIP assay in Figs. 3 and S6 (-0.6 kb)                                   |
| 27567  | hIRF1-(-0.1k)-F         | agctctacaacagcctgatttcc  | ChIP assay in Figs. 3 and S6 (-0.1 kb)                                   |
| 27568  | hIRF1-(-0.1k)-R         | aatccaacacttagcgggattc   | ChIP assay in Figs. 3 and S6 (-0.1 kb)                                   |
| 27563  | hIRF1(+0.1k)-F          | actccttagtcgaggcaagacg   | ChIP assay in Figs. 3 and S6 (+0.1 kb)                                   |
| 27564  | hIRF1(+0.1k)-R          | aagagggagaagggcagaggtt   | ChIP assay in Figs. 3 and S6 (+0.1 kb)                                   |
